# Supplementary material for: Essential Oil Volatile Fingerprint Differentiates Croatian cv. Oblica from Other Olea europaea L. Cultivars
Source: MDPI journal article supplement (doi:10.3390/molecules26123533), 2021-06-09
Supplement: s1 [file s1]

**Supplementary Table 1.** *p*-values obtained by Post Hoc One-Way ANOVA analysis of leaf area, color intensity, and total phenolic content from cvs. Lastovka, Oblica, Leccino, and Frantoio at different harvest periods

|                 | leaf area (cm <sup>2</sup> ) |          |                           | color intensity (D65) |          |                          |                  |          |                          |                  |          |                          | total phenolic content (mg kg <sup>-1</sup> ) |          |        |
|-----------------|------------------------------|----------|---------------------------|-----------------------|----------|--------------------------|------------------|----------|--------------------------|------------------|----------|--------------------------|-----------------------------------------------|----------|--------|
|                 |                              |          |                           | <i>L</i> *            |          |                          | <i>a</i> *       |          |                          | <i>b</i> *       |          |                          |                                               |          |        |
| Harvest periods | <i>p</i> -values             |          |                           | <i>p</i> -values      |          |                          | <i>p</i> -values |          |                          | <i>p</i> -values |          |                          | <i>p</i> -values                              |          |        |
| August          | Lastovka                     | Oblica   | 2.22x10 <sup>-14**</sup>  | Lastovka              | Oblica   | 3.54x10 <sup>-5*</sup>   | Lastovka         | Oblica   | NS**                     | Lastovka         | Oblica   | 0.009**                  | Lastovka                                      | Oblica   | NS*    |
|                 |                              | Leccino  | 5.65x10 <sup>-13**</sup>  |                       | Leccino  | 1.73x10 <sup>-11*</sup>  |                  | Leccino  | 1.69x10 <sup>-11**</sup> |                  | Leccino  | 8.67x10 <sup>-12**</sup> |                                               | Leccino  | NS*    |
|                 |                              | Frantoio | 2.83x10 <sup>-14**</sup>  |                       | Frantoio | 4.42x10 <sup>-8*</sup>   |                  | Frantoio | 1.78x10 <sup>-11**</sup> |                  | Frantoio | 0.001**                  |                                               | Frantoio | NS*    |
|                 | Oblica                       | Leccino  | 0.002**                   | Oblica                | Leccino  | 1.75x10 <sup>-11*</sup>  | Oblica           | Leccino  | 1.07x10 <sup>-11**</sup> | Oblica           | Leccino  | 1.78x10 <sup>-11**</sup> | Oblica                                        | Leccino  | NS*    |
|                 |                              | Frantoio | 5.69x10 <sup>-14**</sup>  |                       | Frantoio | NS*                      |                  | Frantoio | 1.47x10 <sup>-11**</sup> |                  | Frantoio | 2.59x10 <sup>-9**</sup>  |                                               | Frantoio | NS*    |
|                 | Leccino                      | Frantoio | 1.54x10 <sup>-13**</sup>  | Leccino               | Frantoio | 1.69x10 <sup>-11*</sup>  | Leccino          | Frantoio | 1.66x10 <sup>-11**</sup> | Leccino          | Frantoio | 1.33x10 <sup>-11**</sup> | Leccino                                       | Frantoio | NS*    |
| September       | Lastovka                     | Oblica   | 4.96x10 <sup>-8**</sup>   | Lastovka              | Oblica   | 1.62x10 <sup>-11**</sup> | Lastovka         | Oblica   | 1.54x10 <sup>-11**</sup> | Lastovka         | Oblica   | 6.03x10 <sup>-12**</sup> | Lastovka                                      | Oblica   | NS**   |
|                 |                              | Leccino  | 4.22x10 <sup>-15**</sup>  |                       | Leccino  | 1.02x10 <sup>-11**</sup> |                  | Leccino  | 4.81x10 <sup>-12**</sup> |                  | Leccino  | 1.78x10 <sup>-12**</sup> |                                               | Leccino  | NS**   |
|                 |                              | Frantoio | 1.78x10 <sup>-7**</sup>   |                       | Frantoio | NS**                     |                  | Frantoio | 1.34x10 <sup>-11**</sup> |                  | Frantoio | 8.62x10 <sup>-12**</sup> |                                               | Frantoio | NS**   |
|                 | Oblica                       | Leccino  | 2.447x10 <sup>-11**</sup> | Oblica                | Leccino  | 1.46x10 <sup>-11**</sup> | Oblica           | Leccino  | 1.73x10 <sup>-8**</sup>  | Oblica           | Leccino  | 2.1x10 <sup>-6**</sup>   | Oblica                                        | Leccino  | NS**   |
|                 |                              | Frantoio | 3.90x10 <sup>-13**</sup>  |                       | Frantoio | 1.60x10 <sup>-11**</sup> |                  | Frantoio | 0.0001**                 |                  | Frantoio | 6.16x10 <sup>-8**</sup>  |                                               | Frantoio | NS**   |
|                 | Leccino                      | Frantoio | 2.18x10 <sup>-8**</sup>   | Leccino               | Frantoio | 1.03x10 <sup>-11**</sup> | Leccino          | Frantoio | NS**                     | Leccino          | Frantoio | 1.35x10 <sup>-11**</sup> | Leccino                                       | Frantoio | NS**   |
| October         | Lastovka                     | Oblica   | 4.06x10 <sup>-6**</sup>   | Lastovka              | Oblica   | 0.142**                  | Lastovka         | Oblica   | 6.41x10 <sup>-5**</sup>  | Lastovka         | Oblica   | 9.04x10 <sup>-10**</sup> | Lastovka                                      | Oblica   | 0.004* |
|                 |                              | Leccino  | 3.90x10 <sup>-13**</sup>  |                       | Leccino  | 2x10 <sup>-13**</sup>    |                  | Leccino  | 1.75x10 <sup>-13**</sup> |                  | Leccino  | 1.79x10 <sup>-13**</sup> |                                               | Leccino  | 0.001* |
|                 |                              | Frantoio | 5.26x10 <sup>-14**</sup>  |                       | Frantoio | NS**                     |                  | Frantoio | 1.78x10 <sup>-9**</sup>  |                  | Frantoio | NS**                     |                                               | Frantoio | 0.01*  |
|                 | Oblica                       | Leccino  | 4.12x10 <sup>-13**</sup>  | Oblica                | Leccino  | 3.2x10 <sup>-12**</sup>  | Oblica           | Leccino  | 1.65x10 <sup>-11**</sup> | Oblica           | Leccino  | NS**                     | Oblica                                        | Leccino  | NS*    |
|                 |                              | Frantoio | 5.44x10 <sup>-15**</sup>  |                       | Frantoio | 0.006**                  |                  | Frantoio | NS**                     |                  | Frantoio | 1.96x10 <sup>-11**</sup> |                                               | Frantoio | NS*    |
|                 | Leccino                      | Frantoio | 7.74x10 <sup>-6**</sup>   | Leccino               | Frantoio | 6.36x10 <sup>-13**</sup> | Leccino          | Frantoio | 1.16x10 <sup>-11**</sup> | Leccino          | Frantoio | 5.21x10 <sup>-12**</sup> | Leccino                                       | Frantoio | NS*    |

| Cultivars       | <i>p</i> -values |           |                         | <i>p</i> -values |           |                          | <i>p</i> -values |           |                          | <i>p</i> -values |           |                          | <i>p</i> -values |           |         |
|-----------------|------------------|-----------|-------------------------|------------------|-----------|--------------------------|------------------|-----------|--------------------------|------------------|-----------|--------------------------|------------------|-----------|---------|
| <i>Lastovka</i> | August           | September | $7.69 \times 10^{-5*}$  | August           | September | $1.65 \times 10^{-11**}$ | August           | September | $1.02 \times 10^{-9**}$  | August           | September | $1.19 \times 10^{-6**}$  | August           | September | 0.018*  |
|                 |                  | October   | NS*                     |                  | October   | $1.83 \times 10^{-12**}$ |                  | October   | $5.10 \times 10^{-9**}$  |                  | October   | $5.1 \times 10^{-9**}$   |                  | October   | NS*     |
|                 | September        | October   | $3.58 \times 10^{-6*}$  | September        | October   | $4.93 \times 10^{-12**}$ | September        | October   | $1.38 \times 10^{-12**}$ | September        | October   | 0.0011**                 | September        | October   | NS*     |
| <i>Oblica</i>   | August           | September | 0.01*                   | August           | September | $1.73 \times 10^{-11**}$ | August           | September | $1.04 \times 10^{-11**}$ | August           | September | $1.61 \times 10^{-11**}$ | August           | September | NS*     |
|                 |                  | October   | 0.001*                  |                  | October   | $4.79 \times 10^{-12**}$ |                  | October   | $6.10 \times 10^{-12**}$ |                  | October   | NS**                     |                  | October   | 0.043*  |
|                 | September        | October   | $6.36 \times 10^{-9*}$  | September        | October   | $7.11 \times 10^{-12**}$ | September        | October   | $1.68 \times 10^{-11**}$ | September        | October   | $8.63 \times 10^{-12**}$ | September        | October   | NS*     |
| <i>Leccino</i>  | August           | September | $7.98 \times 10^{-9*}$  | August           | September | $1.52 \times 10^{-11*}$  | August           | September | 0.004**                  | August           | September | $1.74 \times 10^{-11**}$ | August           | September | 0.032*  |
|                 |                  | October   | NS*                     |                  | October   | $1.68 \times 10^{-11*}$  |                  | October   | $1.76 \times 10^{-11**}$ |                  | October   | $8.87 \times 10^{-12**}$ |                  | October   | 0.0002* |
|                 | September        | October   | $8.54 \times 10^{-8*}$  | September        | October   | $1.7 \times 10^{-11*}$   | September        | October   | $1.80 \times 10^{-11**}$ | September        | October   | $8.30 \times 10^{-12**}$ | September        | October   | 0.003*  |
| <i>Frantoio</i> | August           | September | $3.89 \times 10^{-5**}$ | August           | September | $1.65 \times 10^{-11**}$ | August           | September | NS**                     | August           | September | NS**                     | August           | September | NS**    |
|                 |                  | October   | NS**                    |                  | October   | $3.77 \times 10^{-12*}$  |                  | October   | $5.81 \times 10^{-12**}$ |                  | October   | $2.32 \times 10^{-12**}$ |                  | October   | 0.039** |
|                 | September        | October   | $1.83 \times 10^{-6**}$ | September        | October   | $6.66 \times 10^{-12*}$  | September        | October   | $7.99 \times 10^{-12**}$ | September        | October   | $1.45 \times 10^{-12**}$ | September        | October   | NS**    |

*p*-values are obtained by one-way ANOVA analysis, with or without Welch corrections. Means were compared by Tukey's test (\*) if equal variance could be assumed, or by Dunnett T3's test (\*\*). If equal variance could not be assumed. Statistical significant test result is considered for  $p \leq 0.05$ . NS-non significant.

**Supplementary Table 2.** *p*-values obtained by one way ANOVA of volatile compositions from cvs. Lastovka, Oblica, Leccino, and Frantoio at different harvest periods

| Compound                                         | Lastovka         | Oblica | Leccino | Frantoio |
|--------------------------------------------------|------------------|--------|---------|----------|
|                                                  | <i>p</i> -values |        |         |          |
| (Z)-3-hexen-1-ol                                 | 0.044**          | NS*    | NS*     | 0.047*   |
| heptanal                                         | -                | NS*    | 0.001*  | NS*      |
| benzaldehyde                                     | < 0.001**        | NS*    | 0.047*  | 0.005*   |
| pyridne-3-ethnly                                 | < 0.001*         | -      | NS*     | -        |
| (E,Z)-2,4-heptadienal                            | NS*              | 0.004* | NS**    | NS*      |
| (E,E)-2,4-heptadienal                            | NS**             | NS*    | 0.001*  | 0.001*   |
| phenylacetaldehyde                               | NS**             | NS*    | NS*     | NS*      |
| cis-linalool oxide (furanoid)                    | 0.033**          | NS**   | -       | -        |
| 1-octanol                                        | 0.038*           | -      | NS*     | 0.001*   |
| trans-linalool oxide (furanoid)                  | NS*              | NS**   | -       | -        |
| p-cymenene                                       | NS**             | 0.039* | 0.04*   | -        |
| nonanal                                          | NS*              | 0.018* | 0.002*  | 0.014*   |
| 1,4-dimethyl- $\delta$ -3-tetrahydroacetophenone | NS*              | 0.008* | 0.039*  | NS*      |
| limonen-4-ol                                     | NS*              | NS*    | NS*     | NS*      |
| decanal                                          | 0.03*            | 0.024* | NS*     | NS**     |
| $\alpha$ -terpineol                              | NS*              | NS*    | NS**    | NS*      |
| methyl salicylate                                | 0.002*           | NS*    | NS*     | NS**     |
| $\beta$ -cyclocitral                             | 0.031*           | NS*    | NS**    | NS*      |
| chrysanthenyl acetate                            | NS*              | NS*    | NS*     | NS*      |
| $\alpha$ -ionene                                 | 0.021*           | NS*    | 0.012*  | NS**     |
| (E)-2-decenal                                    | 0.006*           | -      | 0.007*  | NS*      |
| vitispirane                                      | 0.016*           | 0.039* | 0.028*  | 0.003*   |
| dihydroedulan II                                 | -                | NS*    | NS*     | -        |
| dihydroedulan I                                  | 0.004**          | -      | 0.006*  | NS**     |
| theaspirane a                                    | 0.01*            | NS*    | NS*     | NS*      |
| theaspirane b                                    | 0.003*           | 0.036* | NS*     | NS**     |
| cyclosativene                                    | 0.019*           | NS*    | -       | NS*      |
| $\alpha$ -copaene                                | 0.021*           | NS*    | NS**    | NS*      |
| (E)- $\beta$ -damascenone                        | 0.026*           | NS*    | 0.006*  | NS**     |
| tetradecane                                      | 0.001*           | 0.001* | 0.002** | NS*      |
| (E)- $\beta$ -damascone                          | 0.014*           | NS*    | NS*     | NS*      |
| $\beta$ -caryophyllene                           | 0.001*           | NS*    | NS*     | 0.042*   |
| dihydrodehydro- $\beta$ -ionone                  | 0.035*           | 0.004* | 0.008*  | NS*      |
| (E)-geranyl acetone                              | 0.001*           | -      | NS*     | NS**     |
| $\alpha$ -humulene                               | 0.007*           | NS*    | 0.010*  | NS*      |
| $\beta$ -ionone                                  | 0.023*           | 0.004* | NS*     | NS*      |
| $\alpha$ -muurolene                              | -                | NS*    | NS*     | NS*      |
| $\alpha$ -farnesene                              | 0.023*           | -      | 0.001*  | 0.048*   |
| $\delta$ -cadinene                               | 0.033*           | NS*    | NS**    | NS*      |
| kessane                                          | -                | -      | -       | NS*      |
| liguloxide                                       | < 0.001*         | 0.017* | 0.008** | 0.001*   |
| (E)-nerolidol                                    | < 0.001*         | NS*    | NS*     | 0.002*   |
| caryophyllene oxide                              | NS*              | NS*    | NS*     | 0.037*   |
| (E)-2-hexenyl benzoate                           | -                | -      | 0.001*  | NS*      |
| hexadecane                                       | NS*              | 0.05*  | NS*     | NS*      |

*p*-values are obtained by one-way ANOVA analysis, with or without Welch corrections. Statistical significant test result is considered for  $p \leq 0.05$ . - not enough data to perform the analysis. NS-non significant.

**Supplementary Table 3.** Principle component analysis. Varimax with Kaiser Normalization was used for the rotation method in the rotated component matrix.

| Volatile compound                                     | Communalities | Rotated Component Matrix |             | Component Score Coefficient Matrix |             |
|-------------------------------------------------------|---------------|--------------------------|-------------|------------------------------------|-------------|
|                                                       |               | Component 1              | Component 2 | Component 1                        | Component 2 |
| volatiles > 2%                                        |               |                          |             |                                    |             |
| (Z)-3-hexen-1-ol                                      | 0.224         | 0.743                    | -0.255      | 0.275                              | -0.194      |
| (E,Z)-2,4-heptadienal                                 | 0.844         | 0.373                    | 0.219       | 0.119                              | 0.020       |
| (E,E)-2,4-heptadienal                                 | 0.490         | 0.489                    | 0.256       | 0.036                              | 0.005       |
| nonanal                                               | 0.315         | -0.182                   | 0.099       | -0.019                             | 0.026       |
| decanal                                               | 0.850         | 0.399                    | 0.440       | -0.002                             | 0.058       |
| chrysanthenyl acetate                                 | 0.515         | 0.377                    | 0.508       | 0.026                              | 0.119       |
| theaspirane a                                         | 0.666         | -0.179                   | -0.914      | 0.097                              | -0.269      |
| theaspirane b                                         | 0.703         | -0.252                   | -0.909      | 0.074                              | -0.255      |
| cyclosativene                                         | 0.777         | 0.871                    | 0.320       | 0.248                              | -0.028      |
| α-copaene                                             | 0.719         | 0.864                    | 0.338       | 0.263                              | -0.021      |
| (E)-β-damascenone                                     | 0.406         | -0.746                   | -0.033      | -0.254                             | 0.096       |
| tetradecane                                           | 0.849         | 0.209                    | 0.307       | -0.082                             | 0.051       |
| (E)-β-damascone                                       | 0.522         | 0.113                    | 0.224       | -0.027                             | 0.117       |
| β-caryophyllene                                       | 0.509         | -0.223                   | -0.312      | 0.086                              | -0.027      |
| dihydrodehydro-β-ionone                               | 0.783         | 0.276                    | 0.608       | -0.072                             | 0.144       |
| humulene                                              | 0.490         | -0.181                   | 0.176       | 0.020                              | 0.132       |
| β-ionone                                              | 0.571         | -0.263                   | -0.523      | -0.039                             | -0.099      |
| α-muurolene                                           | 0.789         | 0.841                    | 0.398       | 0.239                              | 0.001       |
| α-farnesene                                           | 0.308         | -0.167                   | -0.116      | 0.045                              | 0.038       |
| liguloxide                                            | 0.184         | -0.038                   | -0.776      | 0.001                              | -0.247      |
| (E)-nerolidol                                         | 0.050         | -0.039                   | -0.090      | -0.057                             | 0.012       |
| hexadecane                                            | 0.688         | 0.291                    | 0.203       | -0.065                             | -0.012      |
| surface area, color, total phenols and volatiles > 2% |               |                          |             |                                    |             |
| (Z)-3-hexen-1-ol                                      | 0.212         | 0.448                    | 0.107       | 0.049                              | 0.021       |
| (E,Z)-2,4-heptadienal                                 | 0.125         | 0.152                    | 0.319       | 0.014                              | 0.075       |
| (E,E)-2,4-heptadienal                                 | 0.506         | 0.710                    | -0.052      | 0.080                              | -0.019      |
| nonanal                                               | 0.066         | -0.250                   | -0.058      | -0.027                             | -0.011      |

|                                      |       |        |        |        |        |
|--------------------------------------|-------|--------|--------|--------|--------|
| decanal                              | 0.642 | 0.799  | 0.061  | 0.088  | 0.007  |
| chrysanthenyl acetate                | 0.619 | 0.758  | -0.211 | 0.087  | -0.058 |
| theaspirane a                        | 0.563 | -0.604 | -0.446 | -0.063 | -0.100 |
| theaspirane b                        | 0.589 | -0.689 | -0.338 | -0.073 | -0.074 |
| cyclosativene                        | 0.764 | 0.873  | 0.045  | 0.097  | 0.002  |
| $\alpha$ -copaene                    | 0.692 | 0.829  | 0.061  | 0.092  | 0.006  |
| ( <i>E</i> )- $\beta$ -damascenone   | 0.739 | -0.638 | 0.576  | -0.077 | 0.144  |
| tetradecane                          | 0.537 | 0.719  | -0.139 | 0.082  | -0.040 |
| ( <i>E</i> )- $\beta$ -damascone     | 0.110 | -0.096 | 0.317  | -0.014 | 0.077  |
| $\beta$ -caryophyllene               | 0.621 | -0.608 | -0.501 | -0.063 | -0.113 |
| dihydrodehydro- $\beta$ -ionone      | 0.638 | 0.788  | 0.129  | 0.086  | 0.023  |
| humulene                             | 0.305 | -0.521 | -0.185 | -0.056 | -0.039 |
| $\beta$ -ionone                      | 0.445 | -0.650 | 0.150  | -0.074 | 0.042  |
| $\alpha$ -muurolene                  | 0.744 | 0.853  | 0.129  | 0.094  | 0.022  |
| $\alpha$ -farnesene                  | 0.651 | -0.411 | -0.695 | -0.039 | -0.162 |
| liguloxide                           | 0.262 | -0.257 | -0.442 | -0.024 | -0.103 |
| ( <i>E</i> )-nerolidol               | 0.430 | -0.144 | -0.640 | -0.010 | -0.151 |
| hexadecane                           | 0.572 | 0.755  | -0.034 | 0.084  | -0.016 |
| total phenols                        | 0.232 | -0.391 | 0.282  | -0.046 | 0.071  |
| leaf area                            | 0.282 | -0.009 | 0.531  | -0.006 | 0.127  |
| L*                                   | 0.592 | -0.124 | 0.760  | -0.021 | 0.182  |
| a*                                   | 0.506 | 0.568  | -0.428 | 0.068  | -0.108 |
| b*                                   | 0.777 | -0.244 | 0.847  | -0.036 | 0.204  |
| surface area and color               |       |        |        |        |        |
| surface area                         | 0.978 | 0.110  | 0.983  | -0.145 | 0.977  |
| L*                                   | 0.861 | 0.926  | 0.056  | 0.442  | -0.130 |
| a*                                   | 0.719 | -0.847 | -0.033 | -0.408 | 0.138  |
| b*                                   | 0.740 | 0.799  | 0.318  | 0.327  | 0.162  |
| total phenols and the volatiles > 2% |       |        |        |        |        |
| ( <i>Z</i> )-3-hexen-1-ol            | 0.286 | 0.527  | 0.091  | 0.091  | -0.024 |
| ( <i>E,Z</i> )-2,4-heptadienal       | 0.864 | 0.729  | -0.578 | 0.183  | -0.177 |

|                                    |       |        |        |        |        |
|------------------------------------|-------|--------|--------|--------|--------|
| ( <i>E,E</i> )-2,4-heptadienal     | 0.615 | 0.771  | 0.141  | 0.133  | -0.034 |
| nonanal                            | 0.309 | 0.100  | -0.547 | 0.063  | -0.120 |
| decanal                            | 0.725 | 0.413  | 0.745  | 0.017  | 0.119  |
| chrysanthenyl acetate              | 0.582 | 0.402  | 0.648  | 0.022  | 0.100  |
| theaspirane a                      | 0.594 | -0.762 | -0.117 | -0.133 | 0.038  |
| theaspirane b                      | 0.642 | -0.775 | -0.206 | -0.128 | 0.021  |
| cyclosativene                      | 0.787 | 0.767  | 0.445  | 0.107  | 0.029  |
| $\alpha$ -copaene                  | 0.737 | 0.770  | 0.380  | 0.113  | 0.015  |
| ( <i>E</i> )- $\beta$ -damascenone | 0.359 | -0.279 | -0.530 | -0.009 | -0.086 |
| tetradecane                        | 0.834 | 0.153  | 0.900  | -0.044 | 0.172  |
| ( <i>E</i> )- $\beta$ -damascone   | 0.428 | 0.376  | -0.535 | 0.114  | -0.140 |
| $\beta$ -caryophyllene             | 0.487 | -0.649 | -0.257 | -0.100 | 0.000  |
| dihydrodehydro- $\beta$ -ionone    | 0.779 | 0.380  | 0.796  | 0.006  | 0.132  |
| humulene                           | 0.448 | -0.157 | -0.651 | 0.024  | -0.120 |
| $\beta$ -ionone                    | 0.643 | -0.174 | -0.783 | 0.031  | -0.146 |
| $\alpha$ -muurolene                | 0.800 | 0.804  | 0.391  | 0.118  | 0.015  |
| $\alpha$ -farnesene                | 0.292 | -0.513 | -0.168 | -0.082 | 0.007  |
| liguloxide                         | 0.146 | -0.374 | -0.074 | -0.064 | 0.015  |
| ( <i>E</i> )-nerolidol             | 0.061 | -0.196 | -0.149 | -0.024 | -0.015 |
| hexadecane                         | 0.659 | 0.348  | 0.734  | 0.006  | 0.122  |
| total phenols                      | 0.309 | -0.541 | 0.129  | -0.111 | 0.070  |
