# Supplementary material for: Essential Oil Volatile Fingerprint Differentiates Croatian cv. Oblica from Other Olea europaea L. Cultivars
Source: MDPI journal article supplement (doi:10.3390/molecules26123533), 2021-06-09
Supplement: s1 [file s1]

## Supplementary Figures 1-7

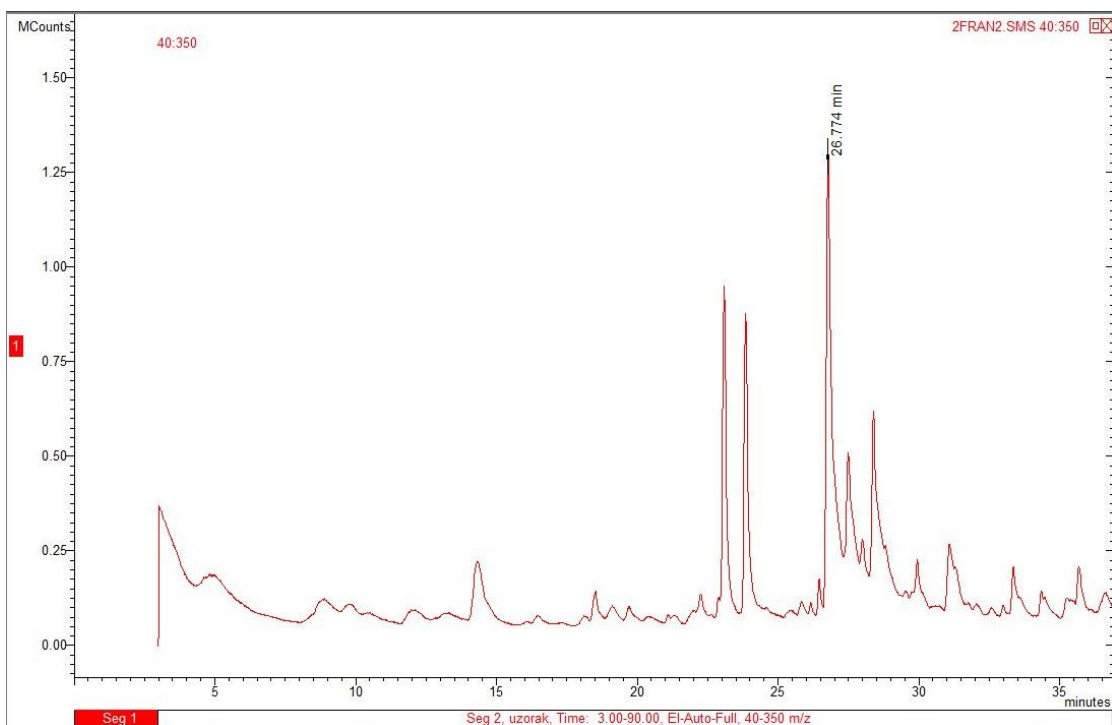

**Suppl. Fig. 1.** GC-MS total ion chromatogram of olive leaves essential oil from cv. Frantoio harvested on 12<sup>th</sup> September

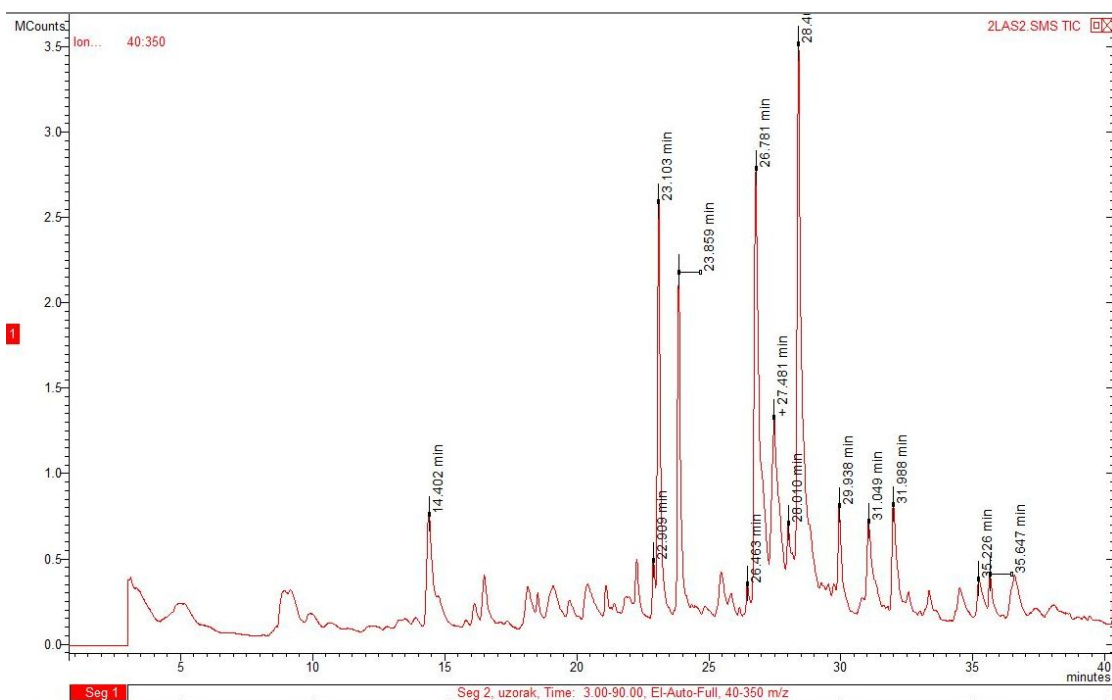

**Suppl. Fig. 2.** GC-MS total ion chromatogram of olive leaves essential oil from cv. Lastovka harvested on 12<sup>th</sup> September

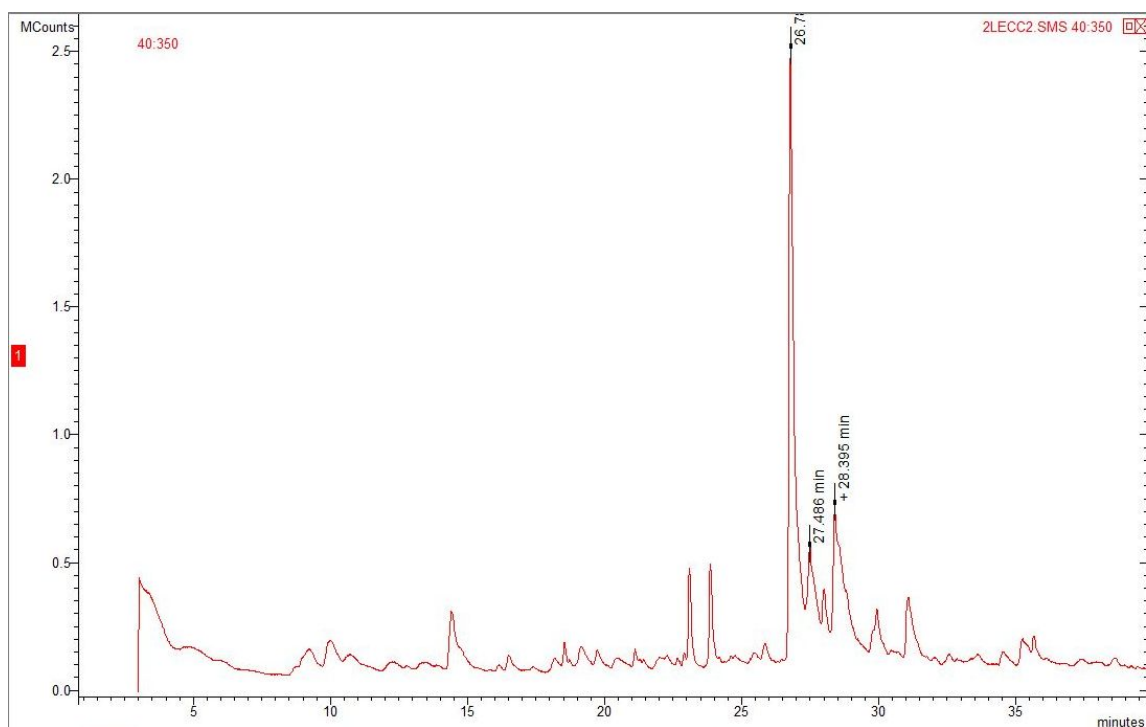

**Suppl. Fig. 3.** GC-MS total ion chromatogram of olive leaves essential oil from cv. Leccino harvested on 12<sup>th</sup> September

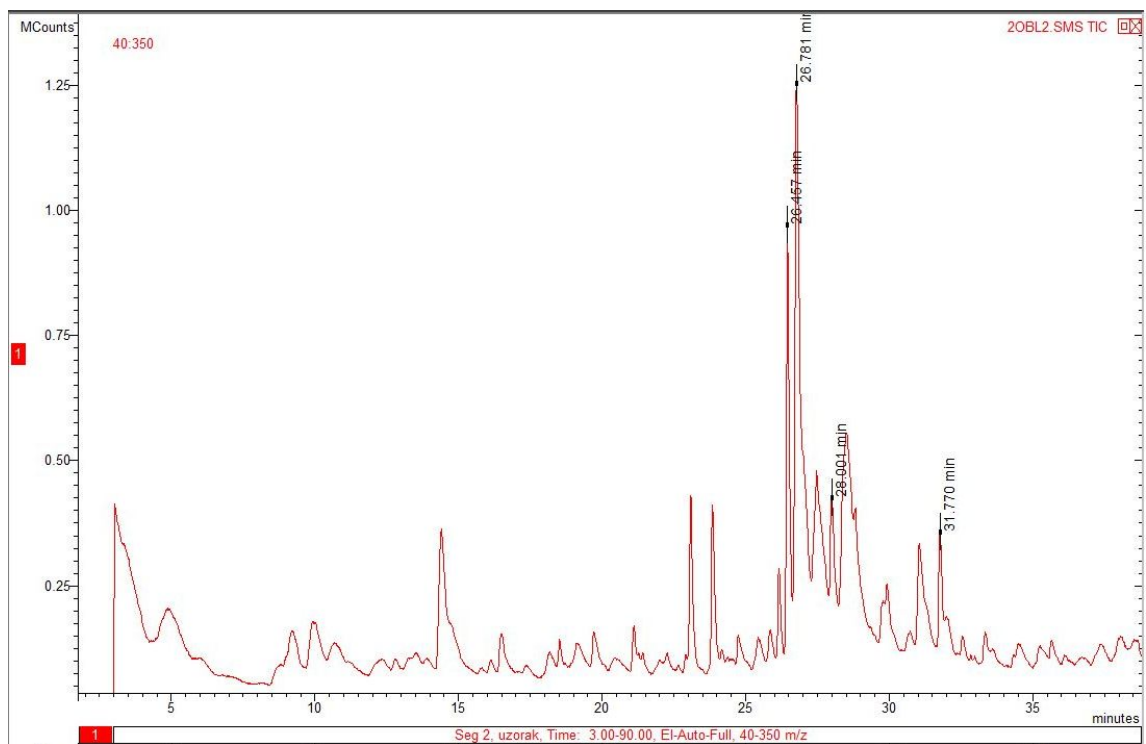

**Suppl. Fig. 4.** GC-MS total ion chromatogram of olive leaves essential oil from cv. Oblica harvested on 12<sup>th</sup> September





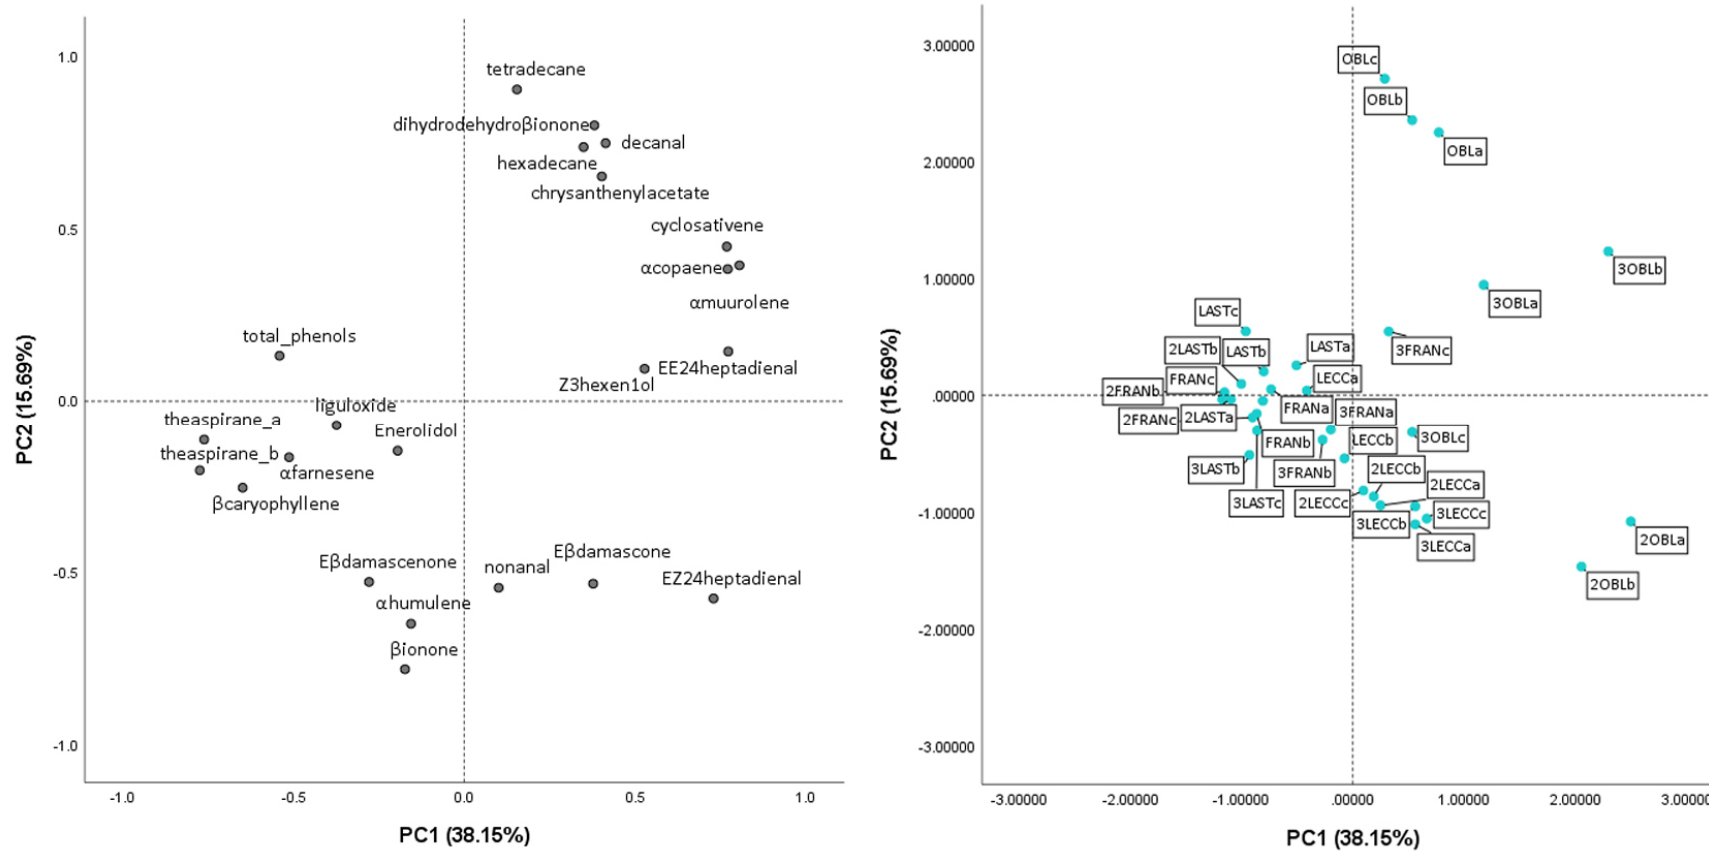

**Suppl. Fig. 7.** Principal component analysis of the total phenols and the volatiles in the amount larger than 2% from cvs. Lastovka (LAST), Oblica (OBL), Leccino (LECC), and Frantoio (FRANT) at different harvest periods (1-3)
